# Supplementary material
Source: PubMed Central journal article supplement (PMC6533917)

Figure 2h

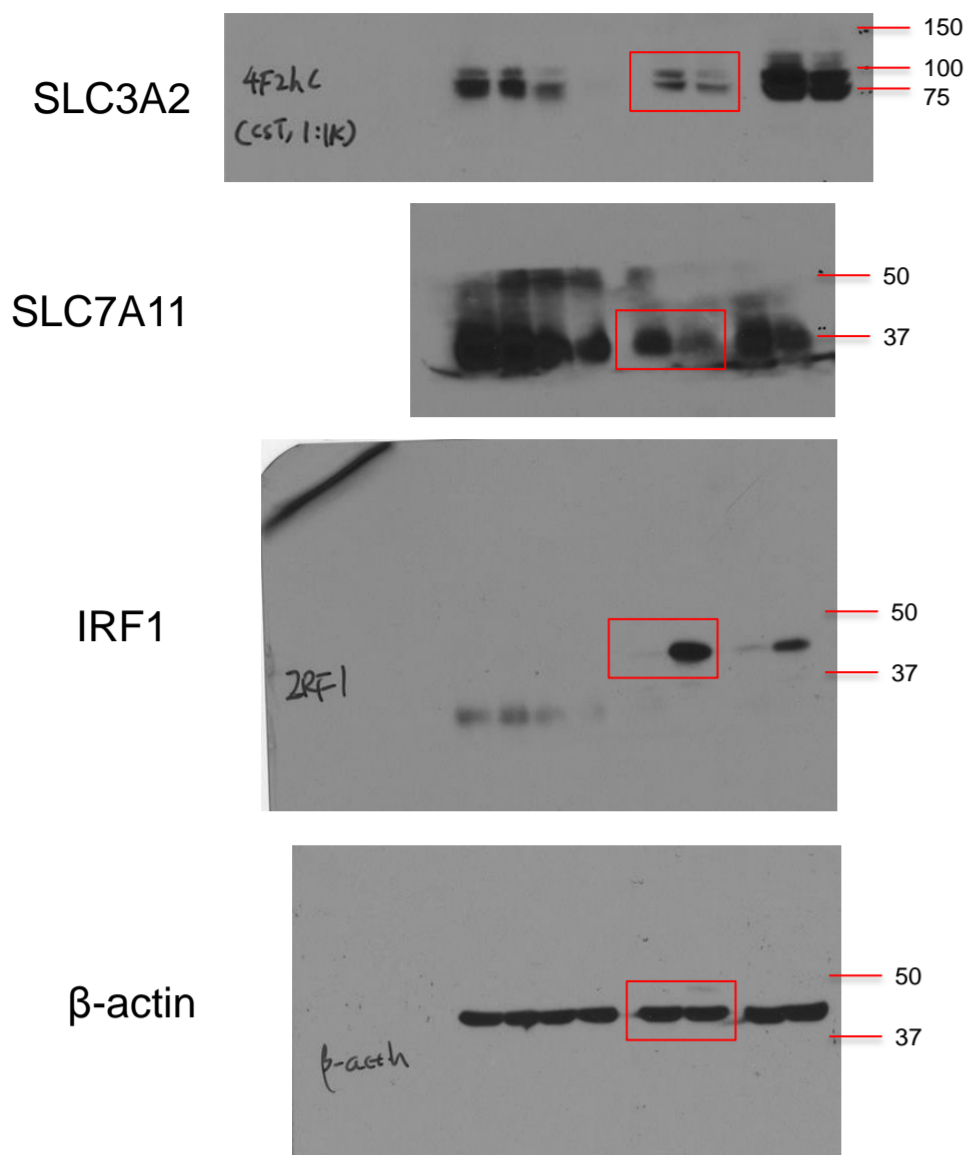

Extended Data Figure 2e

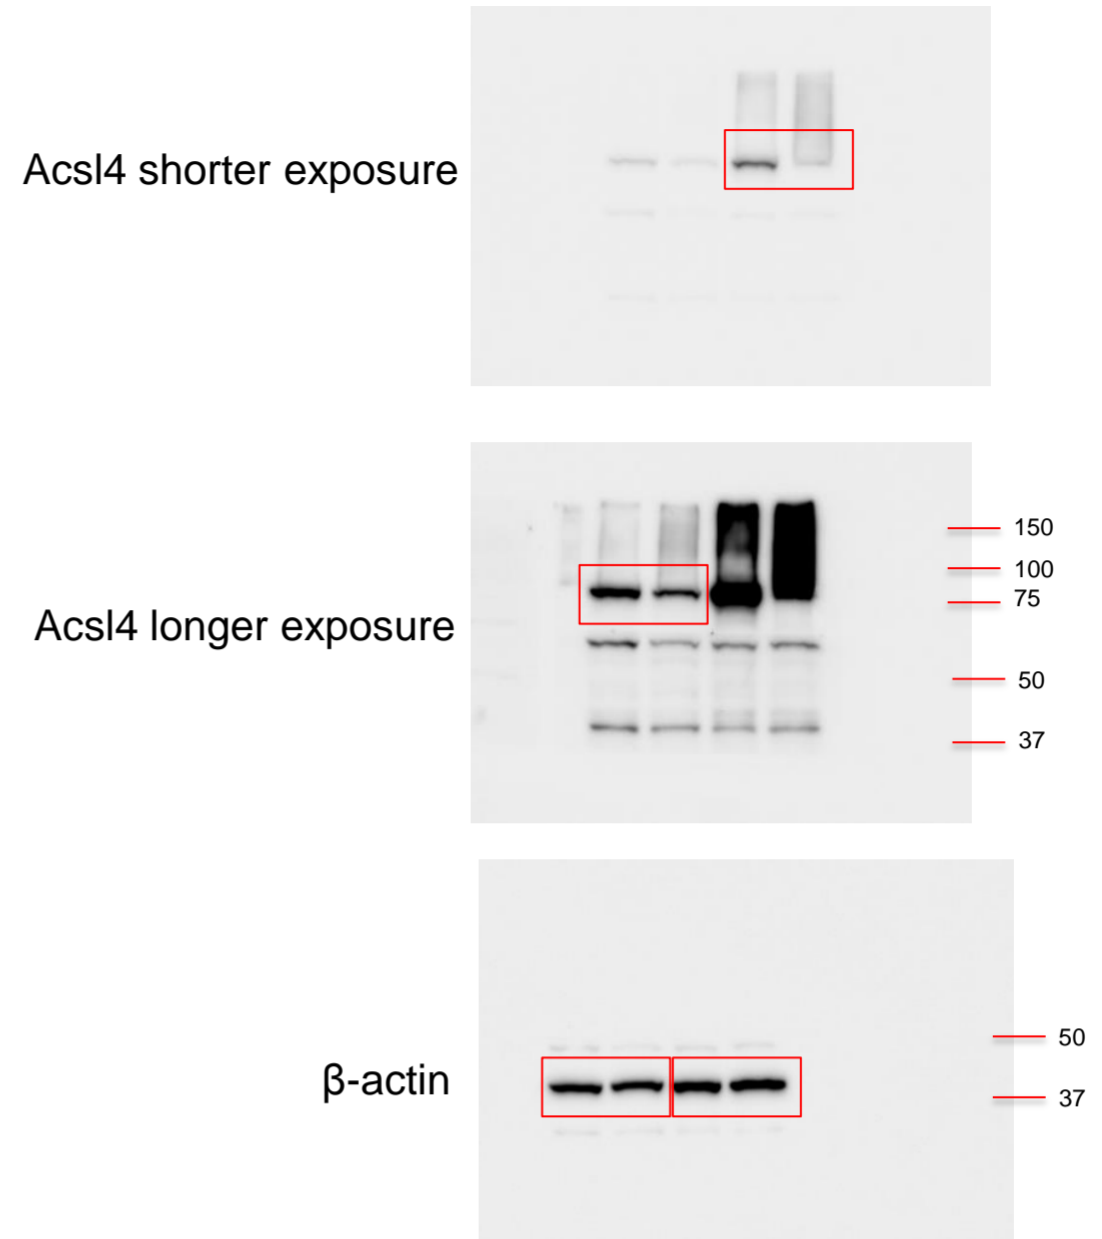

Extended Data Figure 5f

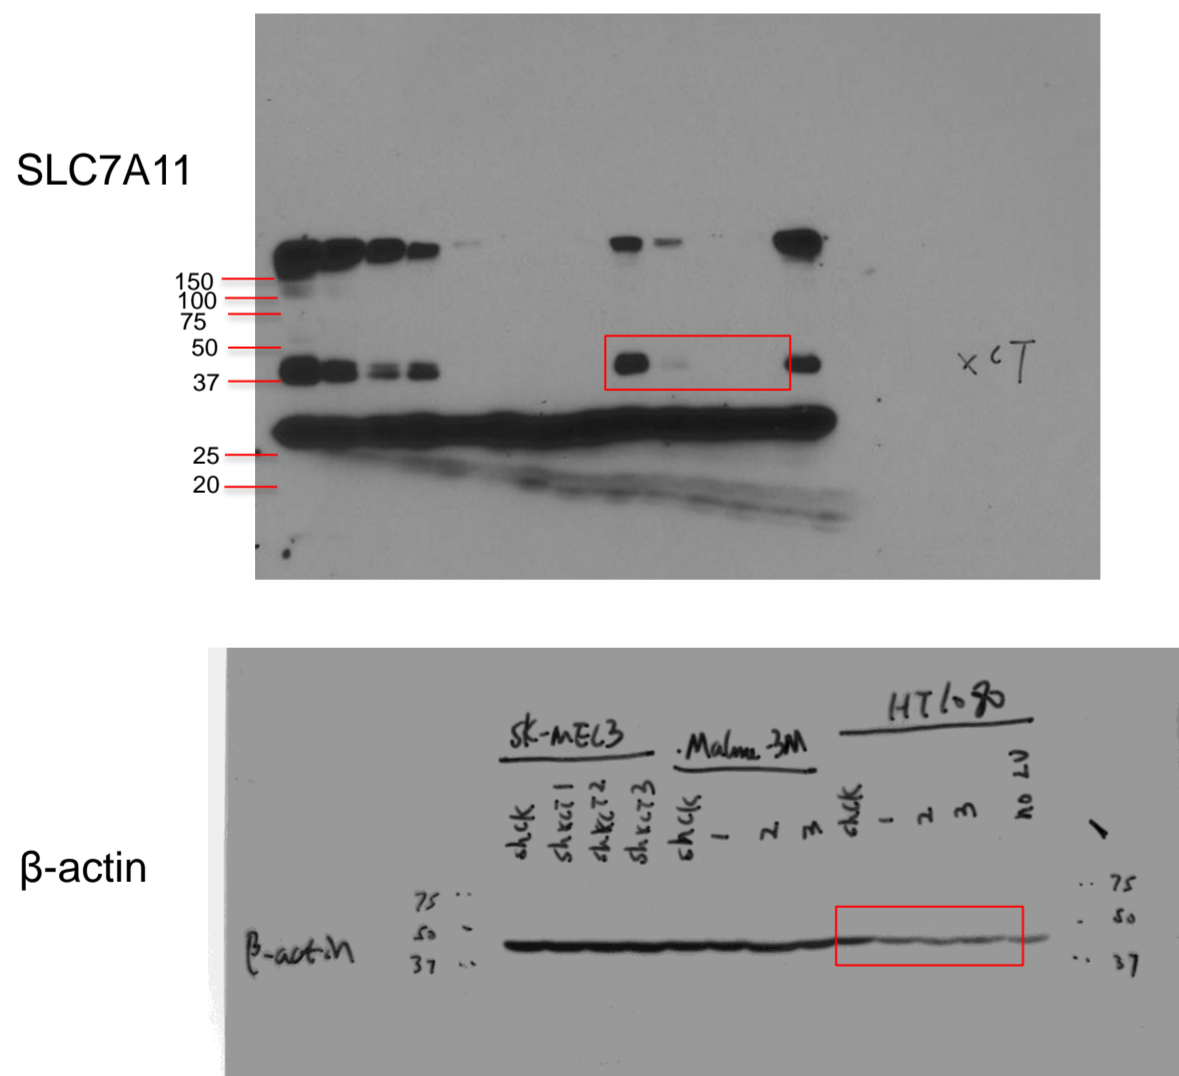

Extended Data Figure 5g

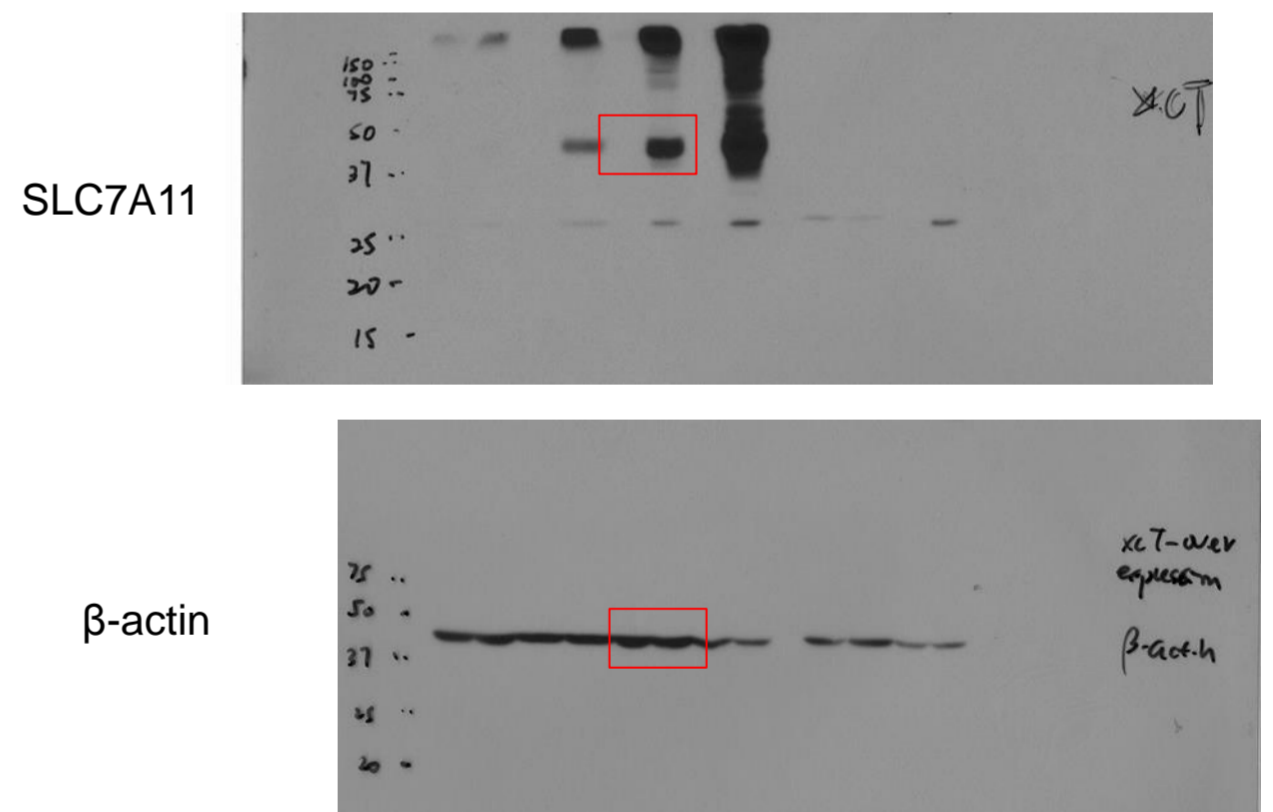

Extended Data Figure 5i

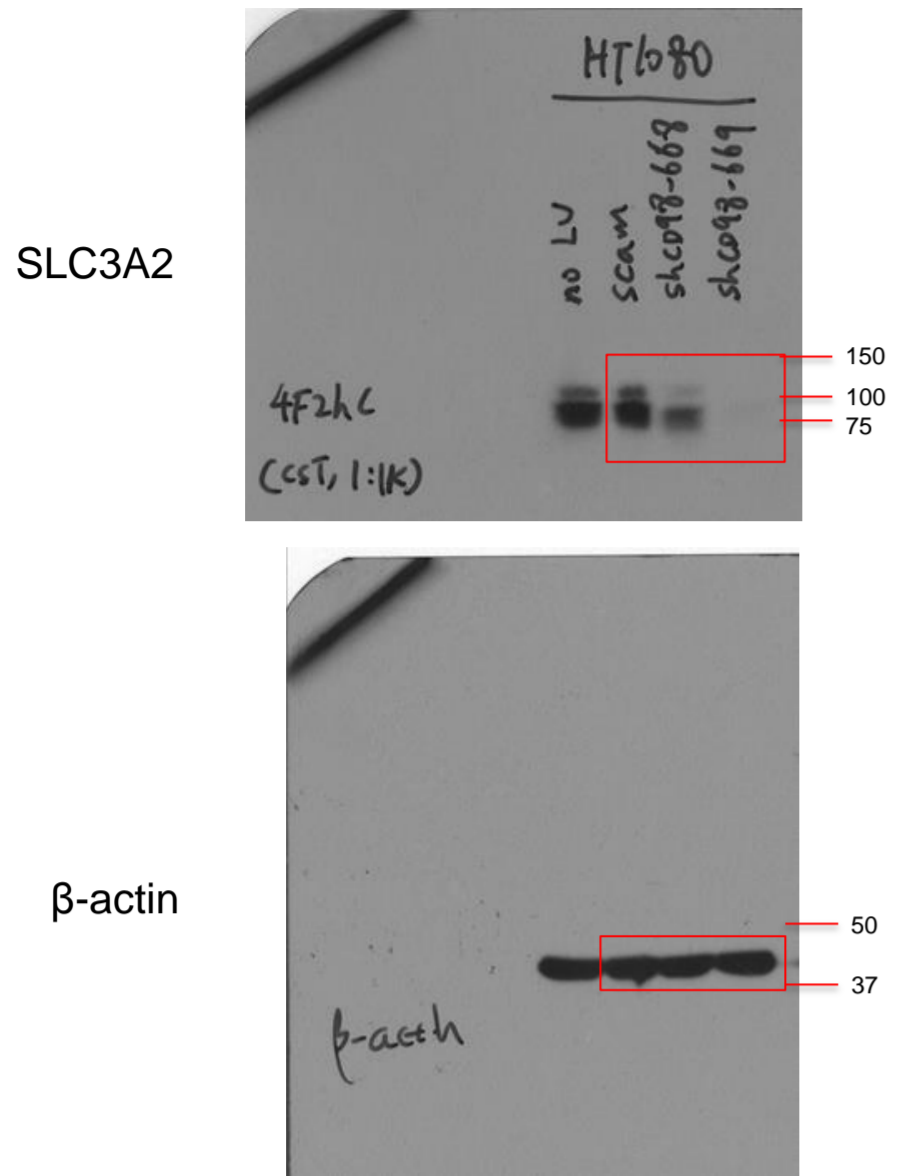

Extended Data Figure 5m

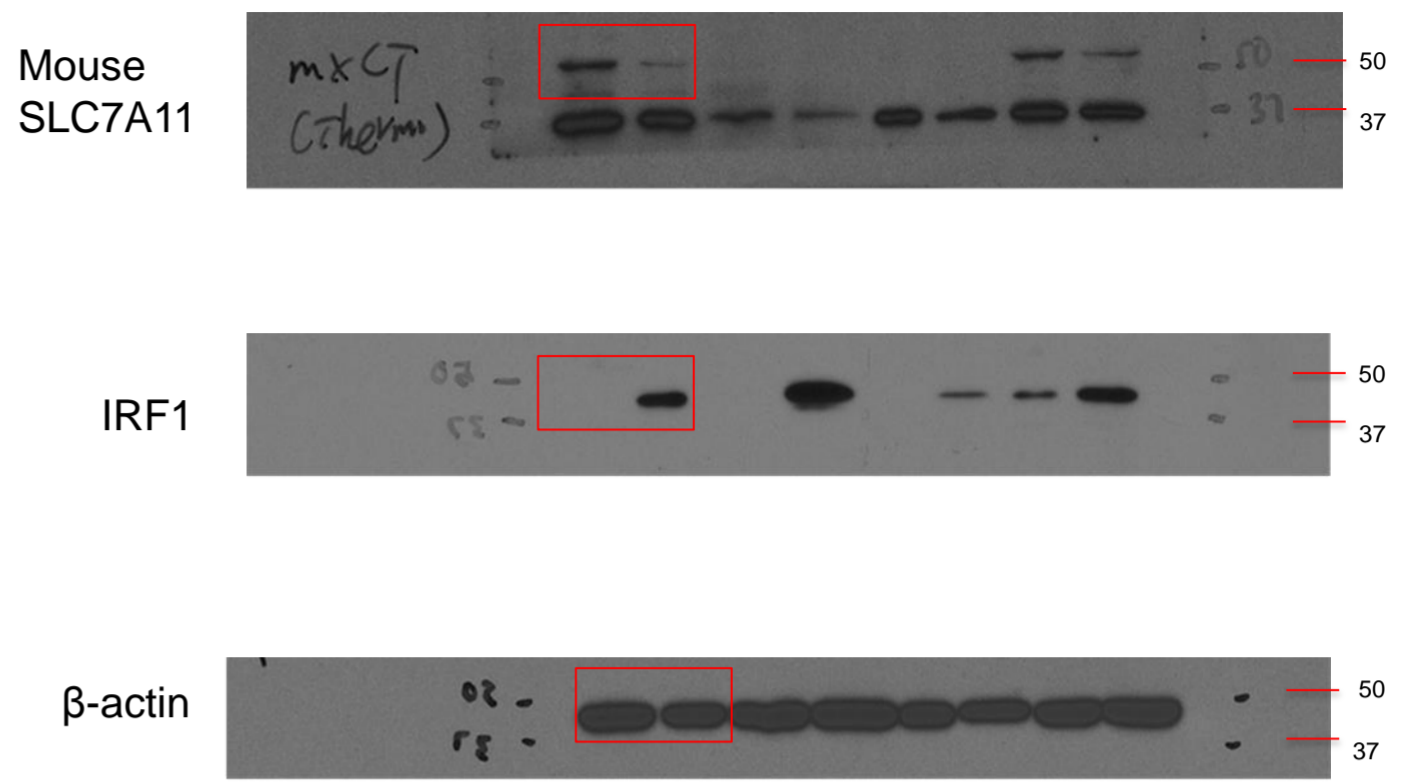

Extended Data Figure 6e

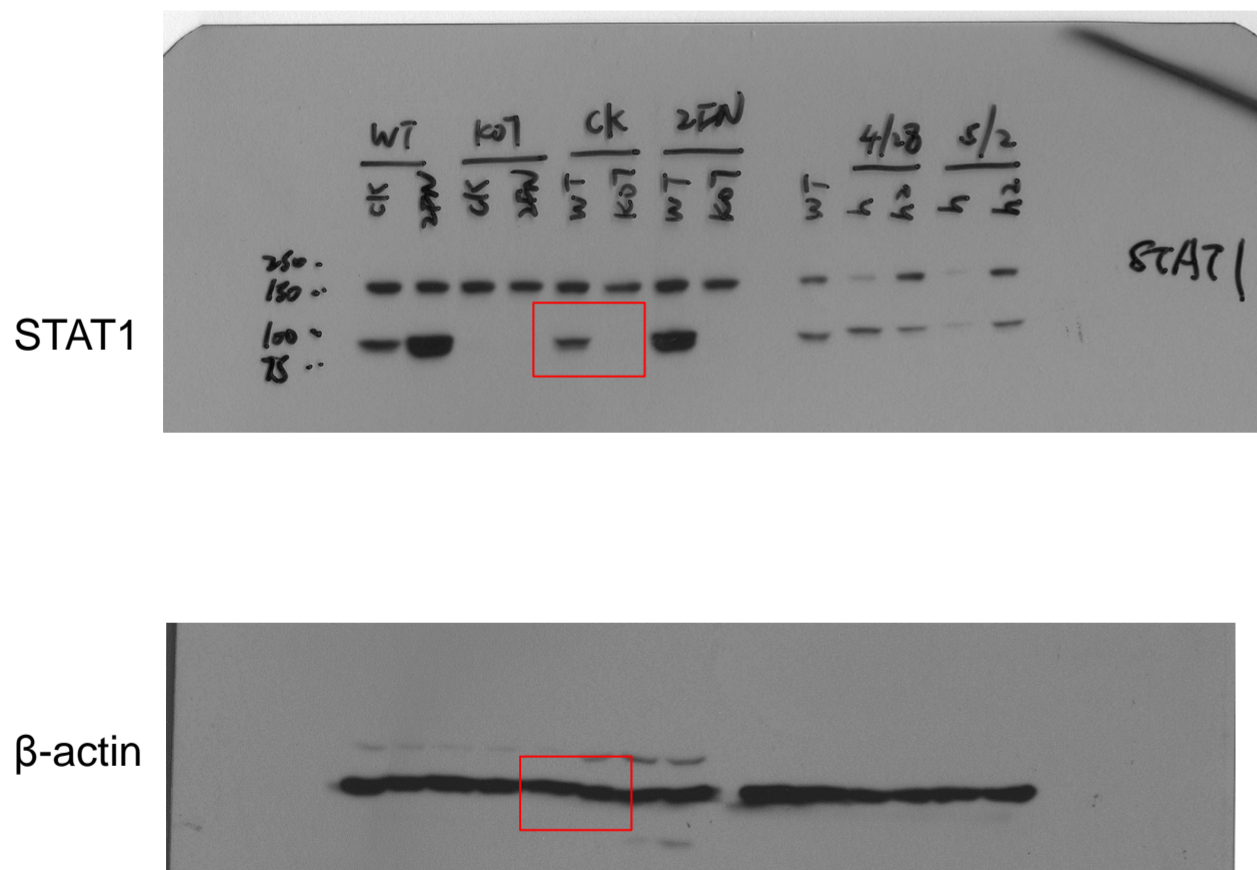

Extended Data Figure 6g

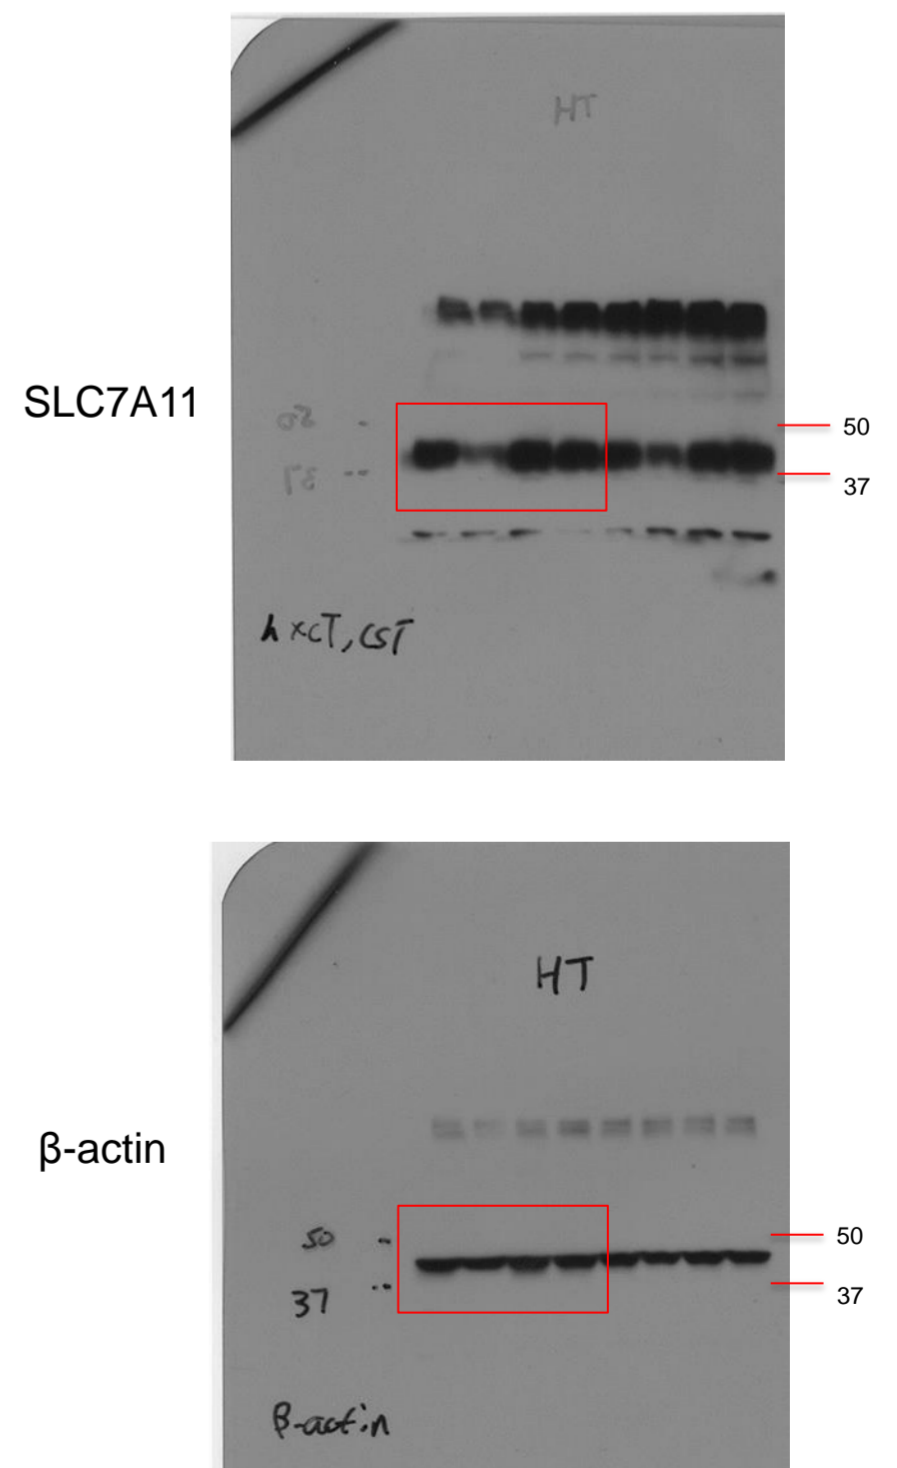

## Gating strategy

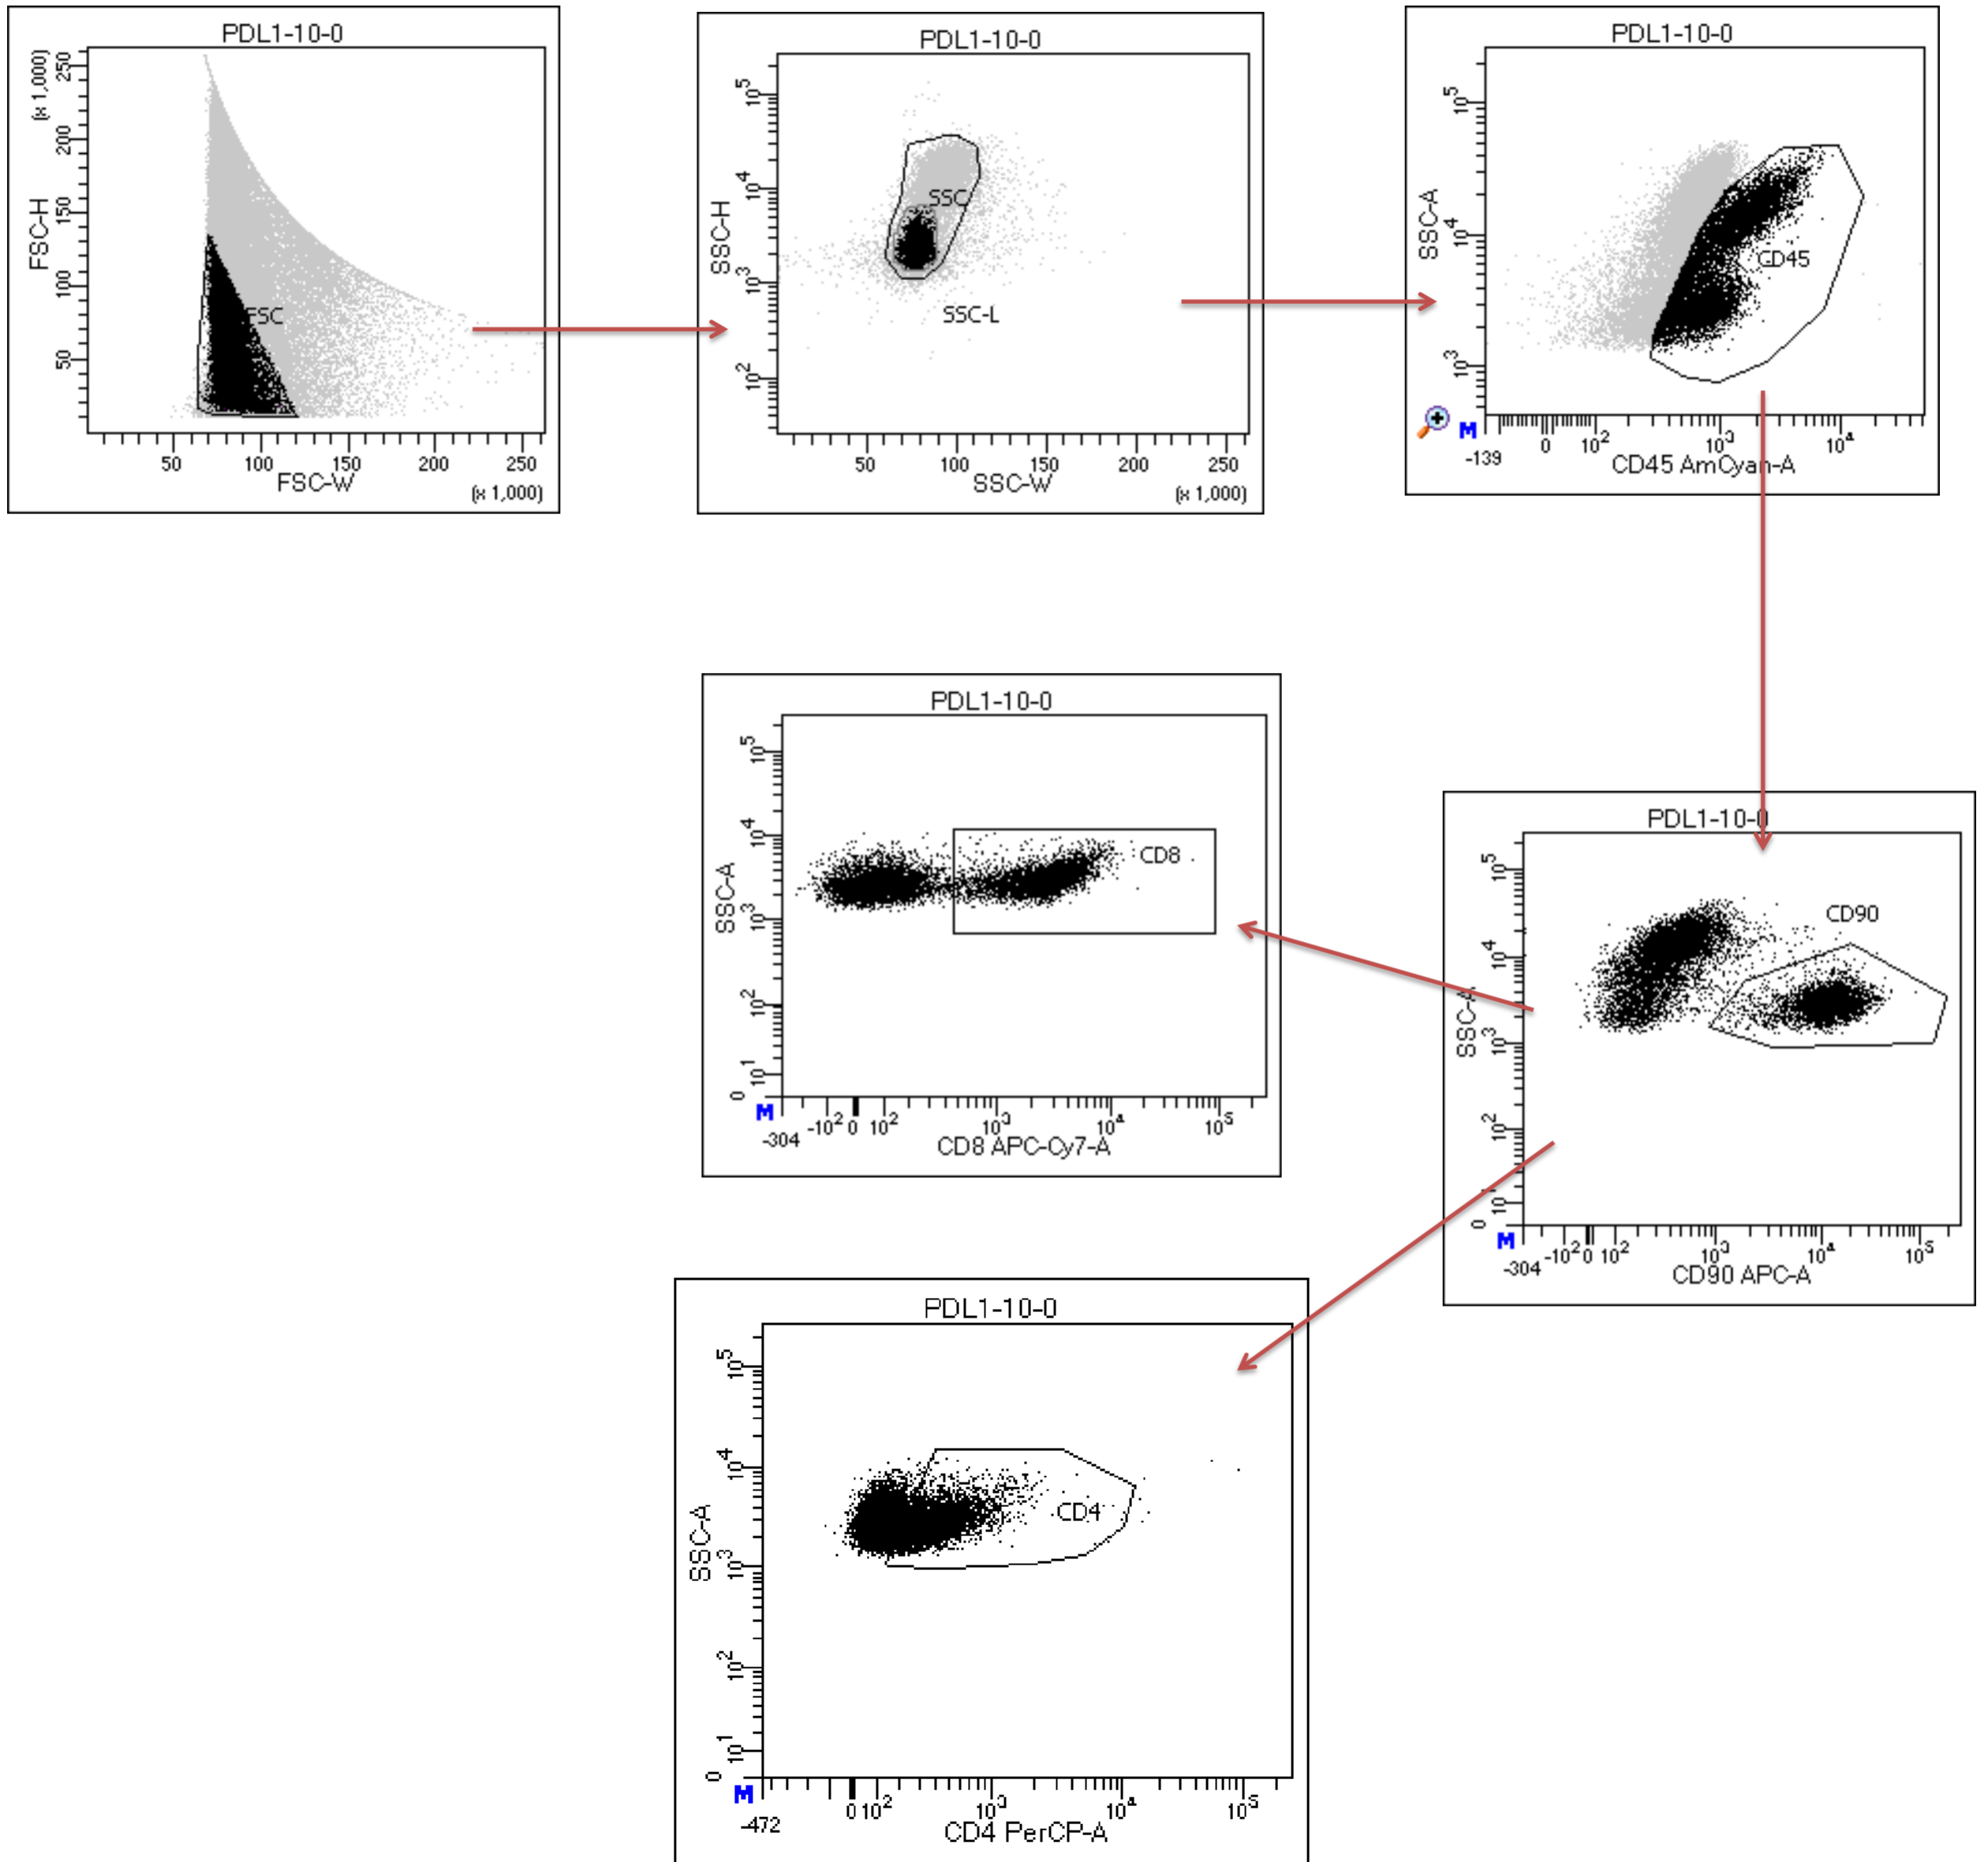

## Cytokines in CD4+ and CD8+ T cells

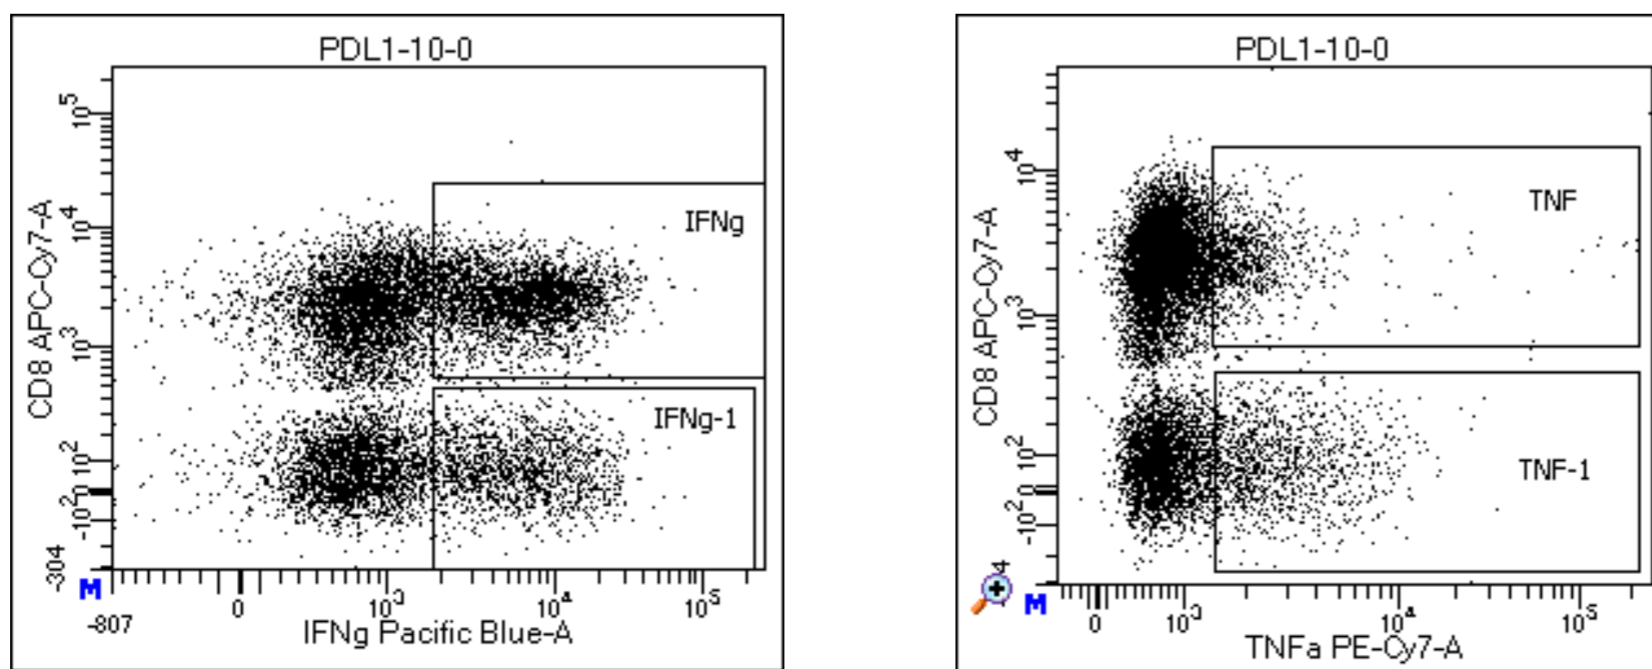

Supplement: NIHMS1525540-supplement-2.pdf [file NIHMS1525540-supplement-2.pdf]
